# Supplementary material for: Real-time particle monitor calibration factors and PM2.5 emission factors for multiple indoor sources
Source: Royal Society of Chemistry journal article supplement (doi:10.1039/c3em00209h), 2013-01-01
Supplement: c3em00209h.xlsx [file c3em00209h.xlsx]

## Sheet: Sheet1
	Table S1: Experimental details
	Real-time particle monitor calibration factors and PM2.5 emission factors for multiple indoor sources
	Philip J. Dacunto, Kai-Chung Cheng, Viviana Acevedo-Bolton, Ruo-Ting Jiang, Neil E. Klepeis, James L. Repace, Wayne R. Ott, and Lynn M. Hildemann
Expt #a	date	location	air exchange rate (h-1)	window position	source	source notesb	emission period (min)	additional cooking notes	# gravimetric samples (each in duplicate)	mass basisc (g)	PM2.5 source strength (mg)	PM2.5 emission rated (mg/min)	PM2.5 emission factore (mg/g)
1	2010-07-27	Stanford	na	closed	cigarette	1 Marlboro Gold, volunteer smoker	5.83		1	0.607	21.6661	3.71631	35.6938
2	2010-07-28	Stanford	0.33	closed	cigarette	1 Marlboro Gold, volunteer smoker	5.5		1	0.587	17.8265	3.24118	30.3688
3	2010-07-29	Stanford	0.29	closed	cigarette	1 Marlboro Gold, volunteer smoker	5.9		1	0.619	19.7659	3.35016	31.932
7	2010-08-31	Stanford	0.18	closed	cigarette	1 Marlboro Gold, volunteer smoker	5		1	0.557	16.904	3.38081	30.3484
13	20-Oct-10 #1	Stanford	4.2	open	cigarette	1 Marlboro Gold, volunteer smoker	5.2		0	0.497	15.4208	2.96553	31.0277
15b	2010-10-21	Stanford	0.26	closed	cigarette (mix: bacon & cigarette)	1 Marlboro Gold, volunteer smoker (2nd srce, 5 min after srce 1)	4.75		4f	0.492	21.8111	4.5918	44.3314
17	2010-12-07	Stanford	0.16	closed	cigarette	3 Marlboro Gold: 1 smoked, 2 smoldered	smoked: 5 smold:12.5		4	1.5	37.5806	NAg	25.0538
18b	2010-12-08	Stanford	0.15	closed	cigarette (mix: burger & cigarette)	3 Marlboro Gold: 1 smoked, 2 smoldered (2nd srce, 5 min after srce 1)	smoked: 5 smold:12.8		0	1.45	42.3155	NAg	29.1831
20	28-Jun-11 #2	Stanford	0.29	closed	cigarette	1 Marlboro Gold, volunteer smoker	6.08		1	0.62	19.2919	3.17301	31.116
21b	2011-06-29	Stanford	0.31	closed	cigarette (mix: bacon & cigarette)	1 Marlboro Gold, volunteer smoker (2nd srce, 6.5 min after srce 1)	5.58		4f	0.6	18.7365	3.35779	31.2274
24	5-Jul-11 #2	Stanford	0.19	closed	cigarette	1 Marlboro Gold, volunteer smoker	5.42		1	0.5	15.6198	2.88189	31.2397
25b	2011-07-06	Stanford	0.26	closed	cigarette (mix: chicken & cigarette)	1 Marlboro Gold, volunteer smoker (2nd srce, 6 min after srce 1)	7.17		4f	0.53	18.4518	2.57348	34.8148
30b	14-Jul-11 #2	Stanford	0.45	closed	cigarette (mix: toast, burned & cigarette)	1 Marlboro Gold, volunteer smoker (2nd srce, 30 min after srce 1)	6		3f	0.58	17.8536	2.9756	30.782
35b	2011-07-27	Stanford	0.23	closed	cigarette (mix: incense Type 1 & cigarette)	1 Marlboro Gold, volunteer smoker (2nd srce, 2 min after srce 1)	5.75		4f	0.5	19.9582	3.47099	39.9164
37b	2-Aug-11 #2	Stanford	0.31	closed	cigarette (mix: incense Type 2 & cigarette)	1 Marlboro Gold, volunteer smoker (2nd srce, 2 min after srce 1)	5.08		1f	0.5	21.839	4.29901	43.678
39b	3-Aug-11 #2	Stanford	0.27	closed	cigarette (mix: incense Type 3 & cigarette)	1 Marlboro Gold, volunteer smoker (2nd srce, 1 min after srce 1)	4.33		1f	0.49	18.3951	4.2483	37.5411
61	2011-12-07	Stanford	0.58	closed	cigarette	1 Marlboro Gold, volunteer smoker	4.6		0	NA	25.2931	5.49849	NA
62	2011-12-08	Stanford	0.57	closed	cigarette	1 Marlboro Gold, volunteer smoker	4.4		1	0.46	22.7652	5.1739	49.4895
66b	2011-12-14	Stanford	0.53	closed	cigarette (mix: cigarette & incense Type 3)	1 Marlboro Gold, volunteer smoker (2nd srce, 2 min after srce 1)	5		1f	0.51	26.9793	5.39587	52.9006
9	2010-09-02	Stanford	0.2	closed	incense type 4 (stick)	1 stick incense, brand unknown	11.5		1	NA	12.5457	1.09093	NA
34	26-Jul-11 #1	Stanford	0.79h	openh	incense type 1 (stick)	1 stick (0.98g) Auromere Incense Mattipal "peace" scent. Auromere Imports Lodi CA	10		2	0.25	16.9941	1.69941	67.9763
34A	26-Jul-11 #2	Stanford	0.29	closed	incense type 1 (stick)	1 stick (1.24g) Auromere Incense Mattipal "peace" scent. Auromere Imports Lodi CA	10		2	0.27	20.5761	2.05761	76.2079
35a	2011-07-27	Stanford	0.23	closed	incense type 1 (mix: incense & cigarette)	1 stick (0.99g) Auromere Incense Mattipal "peace" scent. Auromere Imports Lodi CA (1st srce)	10		4f	0.27	17.2711	1.72711	63.9671
36	2-Aug-11 #1	Stanford	0.2	closed	incense type 2 (cone)	1 cone (1.53g) Triloka Premium Incense, Royal Sandalwood, Windrose Trading Co. Madison VA	16		1	1.08	12.5467	0.784167	11.6173
37a	2-Aug-11 #2	Stanford	0.31	closed	incense type 2 (mix: incense & cigarette)	1 cone (1.60g) Triloka Premium Incense, Royal Sandalwood, Windrose Trading Co. Madison VA (1st srce)	16		1f	0.98	20.7443	1.29652	21.1677
38	3-Aug-11 #1	Stanford	0.17	closed	incense type 3 (stick)	1 stick (1.39g) Ancient Aromas, Ancient Skywatcher "Clarity," American Indians Herb Co., Jamul CA	16		1	0.45	8.84959	0.553099	19.6657
39a	3-Aug-11 #2	Stanford	0.27	closed	incense type 3 (mix: incense & cigarette)	1 stick (1.28g) Ancient Aromas, Ancient Skywatcher "Clarity," American Indians Herb Co., Jamul CA (1st srce)	16		1f	0.46	13.273	0.82956	28.8542
41	9-Aug-11 #2	Menlo Park Apt	0.59	closed	incense type 1 (stick)	1 stick (0.98g) Auromere Incense Mattipal "peace" scent. Auromere Imports Lodi CA	9		1	0.26	24.519	2.72433	94.3038
42	9-Aug-11 #3	Menlo Park Apt	0.62	closed	incense type 3 (stick)	1 stick (1.34g) Ancient Aromas, Ancient Skywatcher "Clarity," American Indians Herb Co., Jamul CA	15		1	0.48	15.184	1.01227	31.6334
53	16-Aug-11 #1	Los Altos kitchen	1.16	closed	incense type 2 (cone)	1 cone (1.65g) Triloka Premium Incense, Royal Sandalwood, Windrose Trading Co. Madison VA	15		2	1.09	22.2526	1.48351	20.4152
63	2011-12-09	Stanford	0.55	closed	incense type 3 (stick)	2 sticks (2.46g) Ancient Aromas, Ancient Skywatcher "Clarity," American Indians Herb Co., Jamul CA	12		1	0.68	22.6615	0.944228	33.3257
66a	2011-12-14	Stanford	0.53	closed	incense type 3 (mix: incense & cigarette)	2 sticks (2.37g) Ancient Aromas, Ancient Skywatcher "Clarity," American Indians Herb Co., Jamul CA (1st srce)	10		1f	0.55	12.8596	0.642981	23.3811
16	2010-12-06	Stanford	0.22	closed	chicken	673g chicken (4 bone-in thighs, with skin), ~10g olive oil, fried	25	electric hot plate, 27 cm hard anodized aluminum frying pan	4	673	42.856	1.71424	0.0636791
23	5-Jul-11 #1	Stanford	0.28	closed	chicken	728g chicken (2 bone-in thighs & 3 drumsticks, with skin), 10g olive oil, fried	24.67	electric hot plate, 27 cm hard anodized aluminum frying pan	1	728	38.973	1.57977	0.0535344
25a	2011-07-06	Stanford	0.26	closed	chicken (mix: chicken & cigarette)	705g chicken (2 bone-in thighs & 3 drumsticks, with skin), 10g olive oil, fried (1st srce)	30.25	electric hot plate, 27 cm hard anodized aluminum frying pan	4f	705	67.0368	2.21609	0.0950877
57	17-Aug-11 #1	Los Altos kitchen	1.15	closed	chicken	352g chicken (2 bone-in thighs, with skin), 5g olive oil, fried	21	electric stove, 27 cm hard anodized aluminum pan	0	352	77.8225	3.70583	0.221087
64	2011-12-12	Stanford	0.68	closed	chicken	388g chicken (2 bone-in thighs, with skin), 10g olive oil, fried	21.5	electric hot plate, 27 cm hard anodized aluminum frying pan	1	388	75.0158	3.4891	0.19334
65	2011-12-13	Stanford	0.55	closed	chicken	349g chicken (2 bone-in thighs, with skin), 10g olive oil, fried	28	electric hot plate, 27 cm hard anodized aluminum frying pan	1	349	71.3843	2.54944	0.20454
26	12-Jul-11 #1	Stanford	0.18	closed	chicken	328g chicken (2 boneless skinless breasts), 10g olive oil, fried	16.3	electric hot plate, 27 cm hard anodized aluminum frying pan	1	328	19.1425	1.17438	0.0583612
5	2010-08-18	Stanford	0.28	closed	bacon	213g bacon strips, fried	10.25	electric hot plate, 27 cm hard anodized aluminum frying pan	1	213	29.2007	2.84885	0.137093
11	19-Oct-10 #1	Stanford	2.51	open	bacon	~100g bacon (5 strips), fried	8.5	electric hot plate, 27 cm hard anodized aluminum frying pan	4	100	65.5679	7.71388	0.655679
15a	2010-10-21	Stanford	0.26	closed	bacon (mix: bacon & cigarette)	116g bacon (5 strips), fried (1st srce)	11	electric hot plate, 27 cm hard anodized aluminum frying pan	4f	116.235	9.4403	0.858209	0.0812173
19	28-Jun-11 #1	Stanford	0.26	closed	bacon	94g bacon (4 strips), fried	10.22	electric hot plate, 27 cm hard anodized aluminum frying pan	1	94	28.3451	2.77349	0.301544
21a	2011-06-29	Stanford	0.31	closed	bacon (mix: bacon & cigarette)	96g bacon (4 strips), fried (1st srce)	11.75	electric hot plate, 27 cm hard anodized aluminum frying pan	4f	96	11.624	0.989275	0.121083
40	9-Aug-11 #1	Menlo Park Apt	0.61	closed	bacon	126g (3 strips) Jimmy Dean thick sliced premium bacon	12.5	gas stove, 25 cm stainless steel pan	1	126	75.6011	6.04809	0.600009
4	2010-08-17	Stanford	0.27	closed	burger	~230g hamburger (2 x ~115g patties), 80% lean, fried	8.4	electric hot plate, 27 cm hard anodized aluminum frying pan	1	227	24.6031	2.92894	0.108384
8	2010-09-01	Stanford	0.22	closed	burger	~230g hamburger (2 x ~115g patties), 93% lean, fried	8	electric hot plate, 27 cm hard anodized aluminum frying pan	4	227	64.1215	8.01518	0.282473
12	19-Oct-10 #2	Stanford	1.56	open	burger	312g hamburger (2 x ~150g patties), 93% lean, fried	9	electric hot plate, 27 cm hard anodized aluminum frying pan	4	312	9.62832	1.06981	0.03086
18a	2010-12-08	Stanford	0.15	closed	burger (mix: burger & cigarette)	221g hamburger (2 x 110g patties), fried (1st srce)	12.4	electric hot plate, 27 cm hard anodized aluminum frying pan	0	221.13	64.1622	5.17437	0.290156
50	15-Aug-11 #1	Los Altos living room	0.56	closed	fireplace: synthetic log	2.7 kg Synthetic Log (Duraflame) in fireplace; newspaper burned for 30 sec and held in flue prior to log ignition; doused with water and fireplace front sealed with plastic	17.5		4	NA	276.477	15.7987	NA
51	15-Aug-11 #2	Los Altos living room	0.54	closed	fireplace: wood smoke	cherry wood (several small logs plus kindling) in fireplace; newspaper used as tinder and to prime flue; doused with water and fireplace front sealed	12		4	NA	211.135	17.5946	NA
52	15-Aug-11 #3	Los Altos living room	0.67	closed	fireplace: wood smoke	cherry wood (several small logs plus kindling) in fireplace; newspaper used as tinder and to prime flue; doused with water and fireplace front sealed, but some emissions from dousing entered room	10		1	NA	158.671	15.8671	NA
33	2011-07-21	Stanford	0.26	closed	candles, scented	4 Glade candles, 114g net wt each (lavender & vanilla, Hawaiian Breeze, French Vanilla, Cool Serenity); 20 min burn followed by 3 relighting cycles in final 9 minutes	29		1	NA	8.09343	0.279084	NA
47	11-Aug-11 #1	Menlo Park Apt	0.71	closed	candles, scented	4 Glade candles, 114g net wt each (lavender & vanilla, Hawaiian Breeze, French Vanilla, Cool Serenity); 15 min burn followed by 3 relighting cycles in final 7 min	22		1	NA	13.4192	0.609964	NA
59	17-Aug-11 #3	Los Altos kitchen	1.3	closed	candles, scented	4 Glade candles, 114g net wt each (lavender & vanilla, Hawaiian Breeze, French Vanilla, Cool Serenity); 10 min burn followed by 3 relighting cycles in final 3 min	13		0	NA	7.4288	0.571446	NA
29	14-Jul-11 #1	Stanford	0.27	closed	toast, burned	68g bread (2 slices Orowheat Whole Grain 100% Whole Wheat Bread), bread >90% charred	7	Oster toaster set to 7 (max)	3	67.5	307.887	43.9838	4.56129
30a	14-Jul-11 #2	Stanford	0.45	closed	toast, burned (mix: toast & cigarette)	37g bread (1 slice Orowheat Whole Grain 100% Whole Wheat Bread), bread >90% charred (1st srce)	6	Oster toaster set to 7 (max)	3f	37	22.4946	3.7491	0.607962
45	10-Aug-11 #2	Menlo Park Apt	0.67	closed	toast, burned	26g bread (1 slice Udi's Gluten Free Whole Grain Bread), >95% charred	14.5	Black & Decker "Classic Line" Toaster Oven	1	26	40.6428	2.80295	1.56319
22	2011-06-30	Stanford	0.15	closed	pork chops	326g pork chops (2 bone-in chops), 10g olive oil, fried	10	electric hot plate, 27 cm hard anodized aluminum frying pan	4	325.9	19.218	1.9218	0.0589691
44	10-Aug-11 #1	Menlo Park Apt	0.63	closed	pork chops	322g pork chops (2 bone-in chops), 10g olive oil, fried	12.5		1	322	29.3015	2.34412	0.0909986
46	10-Aug-11 #3	Menlo Park Apt	0.73	closed	french fries	636g sliced potatoes in 1464g peanut oil, deep fried,fried in oil at 160 C for 20 min, 190 C for 1 min	28	gas stove	1	636	10.1416	0.362201	0.0159459
58	17-Aug-11 #2	Los Altos kitchen	1.37	closed	french fries	864g potatoes in peanut oil, deep fried,fried in oil at 160 C for 10 min, 190 C for 2-4 min	21	electric stove, 7.6 L hard anodized aluminum stock pot	1	864	6.75144	0.321497	0.00781417
6	2010-08-19	Stanford	0.14	closed	chicken stir-fry	~200-300g boneless skinless chicken breast (cut into 1-3cm chunks), ~250-300g cutup vegetables (zucchini, broccoli, garlic, celery, pea pods), ~40g soy sauce, ~10g olive oil	17.33	electric hot plate, 27 cm hard anodized aluminum frying pan	1	NA	4.08569	0.235758	NA
14	20-Oct-10 #2	Stanford	1.48	open	chicken stir-fry	315g boneless skinless chicken breast (cut into 1-3 cm chunks), 236g zucchini & garlic, 40g soy sauce, ~10g olive oil	14.75	electric hot plate, 27 cm hard anodized aluminum frying pan	2	590	7.43274	0.503915	0.0125979
43	9-Aug-11 #4	Menlo Park Apt	0.69	closed	ground beef	573g ground beef (broken up), 10g olive oil, 4g spices (cumin, salt, pepper, dried garlic), fried	10	gas stove, 25 cm stainless steel pan	1	573	1.37165	0.137165	0.0023938
55	16-Aug-11 #3	Los Altos kitchen	1.14	closed	ground beef	526g ground beef (broken up), 5g olive oil, fried	12	electric stove, 27 cm hard anodized aluminum pan	1	526	2.50824	0.20902	0.00476851
27	12-Jul-11 #2	Stanford	0.41	closed	chicken, burned	456g chicken (2 boneless skinless breasts), 10g olive oil, fried, 25-50% blackened	19	electric hot plate, 27 cm hard anodized aluminum frying pan	1	456	289.026	15.2119	0.63383
54	16-Aug-11 #2	Los Altos kitchen	1.18	closed	sausage	340g sausage (links, Saag's Fully Cooked Smoked Brats), 5 g olive oil, fried	10	electric stove, 27 cm hard anodized aluminum pan	1	340	53.9606	5.39606	0.158708
28	2011-07-13	Stanford	0.29	closed	fish	466g salmon (2 filets), 10g olive oil, fried	11.7	electric hot plate, 27 cm hard anodized aluminum frying pan	4	466	18.3175	1.5656	0.0393079
32	20-Jul-11 #2	Stanford	0.3	closed	microwaved popcorn, burned	1 bag Orville Redenbacher's Gourmet Popping Corn "Butter" Flavor, popcorn burned (~20% charred)	5	Microwave: Sharp Carousel Model R-209AK (manuf. Aug 97); 9A 120V; popcorn burned	1	NA	23.5236	4.70472	NA
31	20-Jul-11 #1	Stanford	0.13	closed	microwaved popcorn	2 bags Orville Redenbacher's Gourmet Popping Corn "Butter" Flavor, popcorn properly cooked	6	Microwave: Sharp Carousel Model R-209AK (manuf. Aug 97); 9A 120V;	1	NA	4.95317	0.825528	NA
48	11-Aug-11 #2	Menlo Park Apt	0.76	closed	pizza, frozen	396g frozen pizza (Amy's Rice Crust Cheese Pizza), baked	15	gas oven at 190 deg C	1	396	27.8i	1.9i	0.07i
60	17-Aug-11 #4	Los Altos kitchen	1.14	closed	pizza, frozen	388g frozen pizza (Amy's Rice Crust Cheese Pizza), baked	15	electric oven at 190 C	0	388	1.4j	0.1	0.004
49	11-Aug-11 #3	Menlo Park Apt	0.76	closedh	oven drippings	28g cherry pie filling, 28g tomato sauce, 28g olive oil spread on 2 foil-covered pans. Protocol based on oven soiling experiment from Fortmann (2001)	5	gas oven set at 290 C; temp was 200 C when pans went in.	1	84	NAk	NA	NA
56	16-Aug-11 #4	Los Altos kitchen	1.47	closed	oven cleaning	28g cherry pie filling, 28g tomato sauce, & 8g olive oil baked onto oven at 175 C for 1 hour prior to experiment; cherry pie and tomato sauce spread on bottom of oven, oil sides. Then excess scraped off and room ventilated prior to cleaning. Oven soiling based on Fortmann (2001).	120	electric oven, 2-hour self cleaning cycle	0	64	NAl	NA	NA
aThis table lists 66 experiments total. Experiment #10 was SF6 tracer study only and is not included here; however, we repeated #34 as #34A. Thus, total is 66.
bSource lit with lighter in all incense, cigarette, fireplace, and candle experiments
cMass basis for cigarettes & incense is mass consumed; for cooking, it is the pre-cooked mass of food.
dEmission rates for cigarettes are per cigarette per minute; emission rates for incense are per stick/cone per minute.
eEmission factors for cigarettes and incense are per mass consumed; emission factors for cooking are per pre-cooked mass.
fSample includes mixed emissions from two sources.
gEmission rate NA for these experiments because smoked and smoldered cigarettes had different burn times.
hOne window found open ~halfway through period of analysis, then closed. After closure, air exchange rate reduced to 0.26.
iGas oven was not properly cleaned prior to pizza experiment; thus, some of these emissions may not be due to pizza. However, this experiment shows the emissions that can come from a slightly soiled oven.
jElectric oven was cleaned prior to experiment.
kDue to extremely high emissions, experiment stopped and door opened for 3 min after source period to partially clear air; thus, source strength calculation not possible.
lSource strength not calculated due to lack of gravimetric sample, and difficulty of determining end of source period (see text).
